# Supplementary material
Source: ML conference proceedings conference paper supplement (https://openaccess.thecvf.com/content/ICCV_2017/html/Tychsen-Smith_DeNet_Scalable_Real-Time_ICCV_2017_paper.html)
Supplement: Supplementary file 1 [file Tychsen-Smith_DeNet_Scalable_Real-Time_ICCV_2017_supplemental.pdf]

# DeNet: Scalable Real-time Object Detection with Directed Sparse Sampling

## Supplementary Material

Lachlan Tychsen-Smith, Lars Petersson  
 CSIRO (Data61)  
 7 London Circuit, Canberra, ACT, 2601

Lachlan.Tychsen-Smith@data61.csiro.au, Lars.Petersson@data61.csiro.au

### 1. Instance Estimation (Non-Max Supression)

From the classifier output  $\Pr(s|B_S)$  we cluster *detector hits* of the same object to identify unique instances. Following standard practice, this operation is performed via a variant of the Non-Max Suppression (NMS) algorithm. In this algorithm, if two detector hits have the same class and a IoU  $> 0.5$  the hit with the lowest confidence is discarded. An optimized C++ implementation was employed.

### 2. Cost Function Constants ( $\Lambda$ )

Below we provide the constants used for the training cost function:

$$\Lambda_t = BWH \ln(2) \quad (1)$$

$$\Lambda_s = BN^2 \ln(C + 1) \quad (2)$$

$$\Lambda_b = BN^2 \quad (3)$$

where  $B$  is the batch size,  $(W, H)$  is the width and height of the corner distribution (i.e.  $64 \times 64$ ),  $C$  is the number of classes and  $N^2$  is the number of sampling bounding boxes.

### 3. Corner Layer Formulation

The **corner** layer performs the following transformation on the input activations  $\alpha_{t,y,x}$  to obtain the corner distribution  $\Pr(s|k, y, x)$  and sampling feature map  $F_{q,y,x}$ .

$$F_{q,y,x} = \sum_t \omega_{q,t}^F \alpha_{t,y,x} \quad (4)$$

$$\beta_{k,y,x} = \sum_t \omega_{k,t}^P \alpha_{t,y,x} \quad (5)$$

$$\Pr(s|k, y, x) = \frac{\exp(s\beta_{k,y,x})}{\exp(\beta_{k,y,x}) + \exp(-\beta_{k,y,x})} \quad (6)$$

where  $\omega^F$  and  $\omega^P$  are learnt parameters, and  $s = \{-1, 1\}$  indicates the presence of a corner . In practice both linear transforms are performed with a single operation.

### 4. Sparse Layer Formulation

As input the **sparse** layer takes the feature map  $F_{q,y,x}$  and a set of bounding boxes  $B_{n,m} = (x_{n,m}, y_{n,m}, w_{n,m}, h_{n,m})$  where  $x, y, w, h$  are defined as spatial positions in the sampling feature map. Subsequently, the **sparse** layer produces the output activations  $\alpha_{p,n,m}$  where:

$$\alpha_{p,n,m} = \begin{cases} F_{\bar{\sigma}(n,m,p)} & p < |P| - 2 \\ w_{n,m} & p = |P| - 2 \\ h_{n,m} & p = |P| - 1 \end{cases} \quad (7)$$

where  $|P| = QP_W P_H + 2$  is the size of the feature vector,  $Q$  the sampling feature map depth and  $(P_W, P_H)$  is the feature's spatial width and height. Therefore, apart from the last two values which provide the bounding box width and height, each value in the feature vector is mapped to a location in the sampling feature map via the function  $\bar{\sigma}(n, m, p) = \sigma_q(p), \sigma_y(n, m, p), \sigma_x(n, m, p)$  defined below.

$$i(p) = \lfloor p/Q \rfloor \quad (8)$$

$$\sigma_q(p) = p \bmod Q \quad (9)$$

$$\sigma_y(n, m, p) = y_{n,m} + \frac{i(p) \bmod P_W}{P_H - 1} h_{n,m} \quad (10)$$

$$\sigma_x(n, m, p) = x_{n,m} + \frac{\lfloor i(p)/P_W \rfloor}{P_W - 1} w_{n,m} \quad (11)$$

During back propagation the indexing function  $\bar{\sigma}(n, m, p)$  is held constant.
